# Supplementary material
Source: HighWire-hosted journal article supplement (https://ard.bmj.com/content/83/12/1722)
Supplement: inline-supplementary-material-1 [file inline-supplementary-material-1.pdf]

## Supplemental Material

**Low uveitis rates in patients with axial spondyloarthritis treated with bimekizumab: pooled results from phase 2b/3 trials**

Matthew A. Brown,<sup>1,2\*</sup> Martin Rudwaleit,<sup>3\*</sup> Floris A. van Gaalen,<sup>4</sup> Nigil Haroon,<sup>5</sup> Lianne S. Gensler,<sup>6</sup> Carmen Fleurinck,<sup>7</sup> Alexander Marten,<sup>8</sup> Ute Massow,<sup>8</sup> Natasha de Peyrecave,<sup>7</sup> Thomas Vaux,<sup>9</sup> Katy White,<sup>9</sup> Atul Deodhar,<sup>10</sup> Irene E. van der Horst-Bruinsma<sup>11</sup>

\*MAB and MR are joint first authors and contributed equally.

<sup>1</sup>Genomics England, London, UK; <sup>2</sup>Department of Medical and Molecular Genetics, Faculty of Life Sciences and Medicine, King's College London, London, UK; <sup>3</sup>University of Bielefeld, Klinikum Bielefeld, Bielefeld, Germany; <sup>4</sup>Leiden University Medical Center, Department of Rheumatology, Leiden, The Netherlands; <sup>5</sup>University of Toronto, University Health Network, Schroeder Arthritis Institute, Department of Medicine/Rheumatology, Toronto, Ontario, Canada; <sup>6</sup>University of California, San Francisco, Department of Medicine/Rheumatology, San Francisco, California, USA; <sup>7</sup>UCB Pharma, Brussels, Belgium; <sup>8</sup>UCB Pharma, Monheim am Rhein, Germany; <sup>9</sup>UCB Pharma, Slough, UK; <sup>10</sup>Oregon Health & Science University, Division of Arthritis & Rheumatic Diseases, Portland, Oregon, USA; <sup>11</sup>Radboud University Medical Centre, Department of Rheumatology, Nijmegen, The Netherlands

**Correspondence to:** Matthew A. Brown (Genomics England, London, UK; matt.brown@genomicsengland.co.uk)

Supplemental Material

- 1
- SUPPLEMENTARY DATA**
- 2
- Figure S1. Pooling of data from the phase 3 BE MOBILE 1 and 2 and phase**
- 3
- 2 BE AGILE trials**

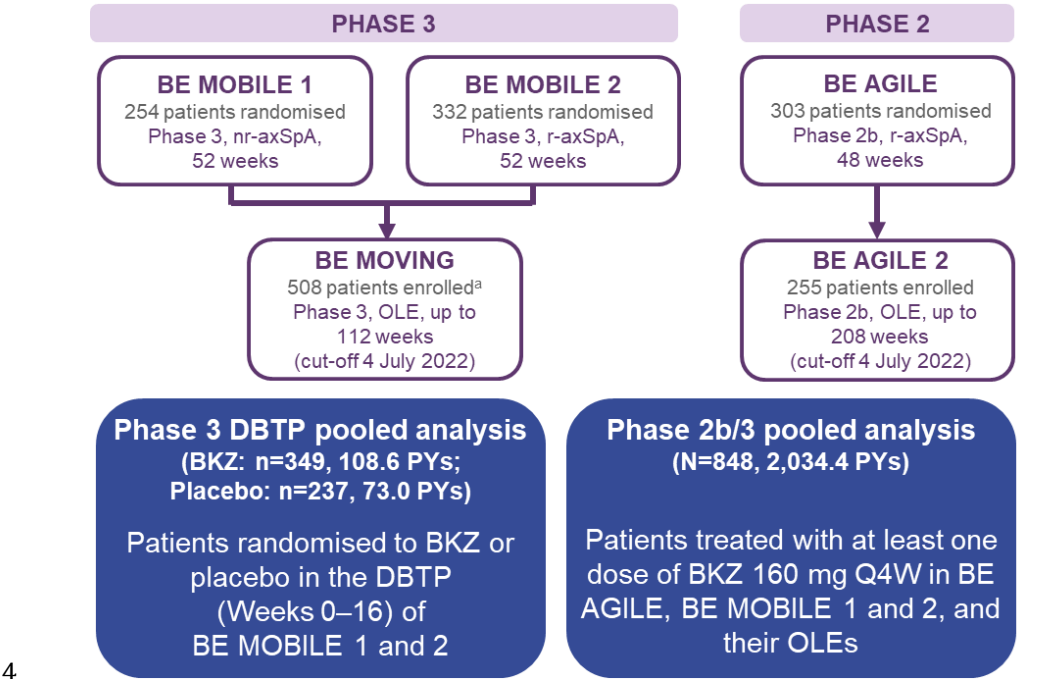

- 5
- <sup>a</sup>Trial ongoing. BKZ: bimekizumab; DBTP: double-blind treatment period; nr-axSpA: non-radiographic
- 6
- axial spondyloarthritis; OLE: open-label extension; PYs: patient-years; Q4W: every four weeks; r-axSpA:
- 7
- radiographic axial spondyloarthritis.
